# Supplementary material for: Downscaling future precipitation extremes to urban hydrology scales using a spatio-temporal Neyman–Scott weather generator
Source: Copernicus journal article supplement (doi:10.5194/hess-20-1387-2016), 2016-04-08
Supplement: Supplementary file 1 [file hess-20-1387-2016-supplement.zip]

## S1. Supplement

### S1.1. Use of the weather generator

Working with the spatio-temporal Neyman-Scott weather generator (WG) implemented in RainSim (Burton et al., 2008) requires the user to go through a number of steps. The steps are perfectly summed up in Burton et al. (2010a), Figure 1 which is reproduced in Figure S1. Furthermore, these steps are generally described in a number of publications by the model developers (i.e. Burton et al. 2008; 2010a; 2010b). In this appendix we will more specifically describe how the workflow has been for this specific study as a means of understanding the possibilities and limitations the model provide given the data available.

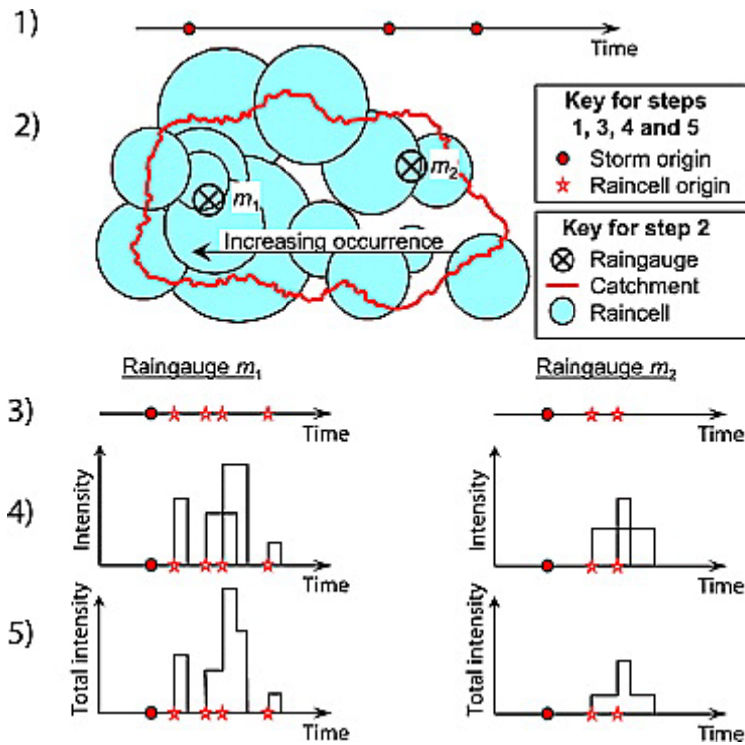

Figure S1 Conceptual sketch of the functioning of the the spatio-temporal Neyman-Scott weather generator. Figure from Burton et al. (2010a).

#### S1.1.1. Initial treatment of input data

The input data has to be structured in a certain way for the WG to accept it; that is the WG only accepts input of time series text files at either the hourly or daily level, one data point at each line. Thus, the 60 observational time series available in 1-minute resolution was merged into time series with hourly data (clock hours).

The WG's build-in functionality (-a for analyze) was used to calculate the statistics for the observational time series:

- Mean daily precipitation
- Variation of the daily and hourly precipitation intensities
- Skewness of the daily and hourly precipitation intensities

- Probability of dry days and hours
- The auto-correlation between consecutive time-steps (the lag-1 auto-correlation)
- The cross-correlation of precipitation intensities at the hourly time step

### S1.1.2. Estimating parameters for the WG

The statistics above are used along with the weights ( $w$ 's) reported in Table 3 to estimate parameters for the WG (or fitting it following the terminology of Burton et al. (2010a)). The parameters describing the WG are given in Section 3.1.

All these parameters can be linked to the statistical properties of the time series through a set of equations derived by Cowpertwait (1995) and very well reported and explained by Cowpertwait (2006).

With the statistics given as  $\Omega$  and the WG parameters as  $\Psi$  the objective function becomes (after Burton et al. (2008), equation 5):

$$D(\Psi) = \sum_{g \in \Omega} \frac{w_g^2}{g_s^2} (\tilde{g} - \hat{g}(\Psi))^2 \quad (S1)$$

where  $\tilde{g}$  is the observed sample estimate of the statistics,  $\hat{g}$  the expected mean value of the statistics arising from the Neyman-Scott process and  $w_g^2/g_s^2$  the weighs scaled according to which statistic they belong to.

### S1.1.3. Generating time series with the WG

The weather generator works in continuous time and space as illustrated in Figure S1 but for this study the output is generated as hourly time series on a regular 2 x 2 km spatial grid covering the model region (see Figure 1) giving 682 time series in every output point. This has been chosen as the spatial resolution to better be able to study the spatial behaviour of the WG. This also limits the length of the time series that can be generated as the total disk space allowed for the full output is 2 GB which corresponds to approximately 50 years of hourly output at the described grid. Also, the time it takes to write this output to disk, and the time it takes to process the data for the post analysis has limited the output data sets used to 10 for this study.

### S1.1.4. Setting up the weather generator to reflect climate change

To change the parameters of the WG to reflect climate change sets of change factors for the input statistics,  $\Omega$ , has been calculated based on time series from RCMs. This approach follows Burton et al. (2010b) who also discusses the applicability of it. Each set of change factors are based on two RCM runs, one for a future period forced as a possible future climate and one forced as present day conditions. The details on the RCMs used the emission scenarios the represent and the time periods used for future and present conditions are given in Table 2.

The WG's build-in functionality (-a for analyze) was used to calculate the statistics for the RCM time series to secure consistency. This meant that pointwise time series were derived for each relevant point in the RCMs used.

The change factors,  $\alpha_{g,i}^R$ , for each statistic,  $g$ , are calculated for each RCM,  $R$ , for each calendar month,  $i$ , as described by Burton et al. (2010b, equation 1-3) as:

$$\alpha_{g,i}^R = \frac{g_{future,i}^R}{g_{present,i}^R} \quad (S2)$$

With the bounded statistics probability of dry day and hours (here denoted  $PDD$ ) and the auto-correlation (AC) transformed to secure that the change is within their physical bounds:

$$X(PDD) = \frac{PDD}{1-PDD} \quad (S3)$$

$$W(AC) = \frac{1+AC}{1-AC} \quad (S4)$$

This results in a new set of statistics  $\Omega_{future}$  that goes into the objective function (S1) and result in a parameter set for the WG that enables it to generate time series that represent future climate.

## S1.2. Results

### S1.2.1. Tables with estimated parameters for present conditions

Table S1 parameter estimates for  $\lambda$  as shown on Figure 4 for the observational data (SVK) and for the re-fitted data (WG1-10).

| $\lambda^{-1}$ | SVK     | WG1     | WG2     | WG3     | WG4     | WG5     | WG6     | WG7     | WG8     | WG9     | WG10    |
|----------------|---------|---------|---------|---------|---------|---------|---------|---------|---------|---------|---------|
| January        | 0.01302 | 0.01330 | 0.01498 | 0.01396 | 0.01433 | 0.01040 | 0.01298 | 0.01150 | 0.00494 | 0.01399 | 0.01479 |
| February       | 0.00311 | 0.00639 | 0.00635 | 0.00425 | 0.00614 | 0.00776 | 0.00909 | 0.00744 | 0.00601 | 0.00905 | 0.00363 |
| March          | 0.00800 | 0.00863 | 0.00838 | 0.00889 | 0.00849 | 0.00865 | 0.00754 | 0.00972 | 0.00987 | 0.00876 | 0.00706 |
| April          | 0.00534 | 0.00528 | 0.00486 | 0.00564 | 0.00467 | 0.00558 | 0.00526 | 0.00553 | 0.00184 | 0.00589 | 0.00556 |
| May            | 0.00369 | 0.00343 | 0.00411 | 0.00379 | 0.00427 | 0.00501 | 0.00421 | 0.00390 | 0.00321 | 0.00425 | 0.00355 |
| June           | 0.00496 | 0.00247 | 0.00530 | 0.00516 | 0.00419 | 0.00545 | 0.00304 | 0.00524 | 0.00583 | 0.00424 | 0.00483 |
| July           | 0.00241 | 0.00256 | 0.00239 | 0.00346 | 0.00317 | 0.00323 | 0.00238 | 0.00273 | 0.00299 | 0.00237 | 0.00227 |
| August         | 0.00431 | 0.00467 | 0.00431 | 0.00367 | 0.00460 | 0.00173 | 0.00406 | 0.00449 | 0.00520 | 0.00394 | 0.00423 |
| September      | 0.00138 | 0.00186 | 0.00377 | 0.00228 | 0.00189 | 0.00123 | 0.00203 | 0.00161 | 0.00290 | 0.00415 | 0.00222 |
| October        | 0.00253 | 0.00689 | 0.00180 | 0.00420 | 0.00194 | 0.00258 | 0.00242 | 0.00704 | 0.00493 | 0.00326 | 0.00735 |
| November       | 0.01252 | 0.01404 | 0.01404 | 0.01367 | 0.01403 | 0.01260 | 0.01430 | 0.01494 | 0.01617 | 0.01085 | 0.01427 |
| December       | 0.00673 | 0.01349 | 0.00600 | 0.00669 | 0.00818 | 0.01715 | 0.01677 | 0.01553 | 0.00782 | 0.01627 | 0.01402 |

Table S2 parameter estimates for  $\beta$  as shown on Figure 4 for the observational data (SVK) and for the re-fitted data (WG1-10).

| $\beta^{-1}$ | SVK     | WG1     | WG2     | WG3     | WG4     | WG5     | WG6     | WG7     | WG8     | WG9     | WG10    |
|--------------|---------|---------|---------|---------|---------|---------|---------|---------|---------|---------|---------|
| January      | 0.12926 | 0.19326 | 0.20597 | 0.12666 | 0.19542 | 0.06006 | 0.10744 | 0.02000 | 0.02063 | 0.25921 | 0.20368 |
| February     | 0.02000 | 0.05995 | 0.17459 | 0.05659 | 0.05696 | 0.16694 | 0.16685 | 0.14836 | 0.10816 | 0.11009 | 0.02000 |
| March        | 0.26160 | 0.23732 | 0.31519 | 0.24703 | 0.25634 | 0.09151 | 0.31869 | 0.30718 | 0.21401 | 0.29338 | 0.22662 |
| April        | 0.14460 | 0.16793 | 0.21443 | 0.24707 | 0.16919 | 0.36419 | 0.09814 | 0.11082 | 0.02000 | 0.20551 | 0.15723 |
| May          | 0.36423 | 0.37143 | 0.40133 | 0.35422 | 0.39885 | 0.35168 | 0.39883 | 0.31707 | 0.26161 | 0.34296 | 0.37104 |
| June         | 0.15569 | 0.03736 | 0.19790 | 0.18893 | 0.17873 | 0.22867 | 0.04862 | 0.16932 | 0.16105 | 0.09710 | 0.13785 |
| July         | 0.28271 | 0.27543 | 0.33413 | 0.17286 | 0.31382 | 0.16528 | 0.21841 | 0.30512 | 0.31807 | 0.28245 | 0.22614 |
| August       | 0.26222 | 0.32375 | 0.34481 | 0.25464 | 0.30026 | 0.02000 | 0.29563 | 0.24258 | 0.26363 | 0.32693 | 0.27223 |
| September    | 0.02000 | 0.04064 | 0.09488 | 0.03926 | 0.04079 | 0.02000 | 0.03410 | 0.02000 | 0.09008 | 0.13390 | 0.03595 |
| October      | 0.02000 | 0.14681 | 0.02000 | 0.05254 | 0.02000 | 0.02000 | 0.02000 | 0.10305 | 0.11579 | 0.02000 | 0.14739 |
| November     | 0.22144 | 0.24967 | 0.21826 | 0.27672 | 0.22493 | 0.26854 | 0.23389 | 0.20459 | 0.24352 | 0.28537 | 0.12711 |
| December     | 0.02000 | 0.02000 | 0.02000 | 0.02000 | 0.04450 | 0.12276 | 0.14634 | 0.21099 | 0.02000 | 0.11899 | 0.28831 |

Table S3 parameter estimates for  $\rho$  as shown on Figure 4 for the observational data (SVK) and for the re-fitted data (WG1-10).

| $\rho^{-1}$ | SVK     | WG1     | WG2     | WG3     | WG4     | WG5     | WG6     | WG7     | WG8     | WG9     | WG10    |
|-------------|---------|---------|---------|---------|---------|---------|---------|---------|---------|---------|---------|
| January     | 0.00370 | 0.00618 | 0.00693 | 0.00307 | 0.00465 | 0.00363 | 0.00483 | 0.00163 | 0.00971 | 0.00639 | 0.00493 |
| February    | 0.01146 | 0.00531 | 0.01193 | 0.00926 | 0.01346 | 0.01349 | 0.00778 | 0.00799 | 0.01260 | 0.00866 | 0.00414 |
| March       | 0.03435 | 0.02508 | 0.03439 | 0.02311 | 0.02848 | 0.00667 | 0.08365 | 0.04152 | 0.01249 | 0.04499 | 0.04086 |
| April       | 0.01157 | 0.01822 | 0.01930 | 0.02450 | 0.01149 | 0.07914 | 0.00858 | 0.00923 | 0.01231 | 0.02457 | 0.01498 |
| May         | 0.23470 | 0.21657 | 0.33976 | 0.15222 | 0.41792 | 0.14772 | 0.40310 | 0.15279 | 0.03774 | 0.13494 | 0.39314 |
| June        | 0.02376 | 0.02828 | 0.03379 | 0.03202 | 0.02564 | 0.04600 | 0.02783 | 0.03274 | 0.02636 | 0.02064 | 0.01330 |
| July        | 0.14950 | 0.17557 | 0.31857 | 0.06534 | 0.14150 | 0.06134 | 0.07858 | 0.20170 | 0.28676 | 0.18341 | 0.06675 |
| August      | 0.09344 | 0.16116 | 0.18352 | 0.10446 | 0.14480 | 0.05087 | 0.14060 | 0.10522 | 0.10613 | 0.21833 | 0.06468 |
| September   | 0.03437 | 0.02211 | 0.01645 | 0.03457 | 0.02062 | 0.03284 | 0.01947 | 0.05247 | 0.02600 | 0.04129 | 0.03072 |
| October     | 0.01580 | 0.01888 | 0.01793 | 0.01237 | 0.02436 | 0.01344 | 0.02735 | 0.01072 | 0.01078 | 0.01447 | 0.01434 |
| November    | 0.01103 | 0.01114 | 0.01255 | 0.01794 | 0.01142 | 0.02162 | 0.00634 | 0.00668 | 0.00876 | 0.01230 | 0.00463 |
| December    | 0.00272 | 0.00066 | 0.00348 | 0.00264 | 0.00288 | 0.00171 | 0.00194 | 0.00357 | 0.00175 | 0.00190 | 0.00386 |

Table S4 parameter estimates for  $\eta$  as shown on Figure 4 for the observational data (SVK) and for the re-fitted data (WG1-10).

| $\eta^{-1}$ | SVK     | WG1      | WG2     | WG3     | WG4      | WG5     | WG6      | WG7     | WG8     | WG9     | WG10     |
|-------------|---------|----------|---------|---------|----------|---------|----------|---------|---------|---------|----------|
| January     | 0.92830 | 1.02200  | 1.07631 | 0.88349 | 1.00515  | 0.80668 | 0.98951  | 0.61827 | 0.84228 | 1.10143 | 0.95512  |
| February    | 0.88967 | 0.98431  | 1.19556 | 1.02480 | 1.14728  | 1.22784 | 0.99776  | 1.04167 | 1.22199 | 1.07698 | 0.64982  |
| March       | 1.92438 | 1.82938  | 1.90471 | 1.75446 | 1.69872  | 1.18606 | 2.33448  | 1.93616 | 1.49919 | 2.19784 | 1.97384  |
| April       | 1.23663 | 1.43805  | 1.31239 | 1.54710 | 1.16638  | 1.92355 | 1.06420  | 1.19253 | 0.89731 | 1.40733 | 1.26643  |
| May         | 7.40311 | 11.99998 | 8.98552 | 5.35446 | 11.99983 | 4.70409 | 10.20450 | 5.56440 | 2.64089 | 4.51010 | 11.99992 |
| June        | 2.13391 | 1.79619  | 2.65700 | 2.14676 | 2.20053  | 2.59951 | 1.74871  | 2.31182 | 2.24411 | 1.81119 | 1.80567  |
| July        | 3.92201 | 4.54122  | 4.83739 | 2.75868 | 3.79104  | 2.58679 | 3.05385  | 4.04133 | 5.34975 | 3.86296 | 2.58657  |
| August      | 3.95607 | 4.38064  | 5.24630 | 3.36549 | 5.23782  | 1.79857 | 4.52770  | 3.54866 | 4.22462 | 5.68291 | 3.75923  |
| September   | 1.21630 | 1.21131  | 1.52805 | 1.40212 | 1.33305  | 0.88979 | 1.19080  | 1.14619 | 1.31939 | 1.69733 | 1.14020  |
| October     | 1.01915 | 1.49826  | 0.97819 | 1.09480 | 1.02209  | 0.89875 | 1.00766  | 1.27766 | 1.24780 | 0.98171 | 1.40443  |
| November    | 1.22986 | 1.35240  | 1.34166 | 1.40325 | 1.27173  | 1.54015 | 1.08681  | 1.14225 | 1.21430 | 1.23771 | 0.99642  |
| December    | 0.57253 | 0.42605  | 0.57123 | 0.52963 | 0.57437  | 0.62234 | 0.68156  | 0.78759 | 0.53012 | 0.70213 | 0.75501  |

Table S5 parameter estimates for  $\xi$  as shown on Figure 4 for the observational data (SVK) and for the re-fitted data (WG1-10).

| $\xi^{-1}$ | SVK     | WG1     | WG2     | WG3     | WG4     | WG5     | WG6     | WG7     | WG8     | WG9     | WG10    |
|------------|---------|---------|---------|---------|---------|---------|---------|---------|---------|---------|---------|
| January    | 0.64078 | 0.71296 | 0.81020 | 0.70844 | 0.73254 | 0.72882 | 0.69286 | 0.55858 | 0.68563 | 0.75875 | 0.78238 |
| February   | 0.52393 | 0.51543 | 0.41504 | 0.41798 | 0.63859 | 0.57347 | 0.57753 | 0.56164 | 0.45748 | 0.59383 | 0.42305 |
| March      | 0.51229 | 0.45828 | 0.48356 | 0.49380 | 0.50049 | 0.43751 | 0.48066 | 0.56733 | 0.50181 | 0.47127 | 0.41444 |
| April      | 0.36122 | 0.29378 | 0.34995 | 0.31800 | 0.29525 | 0.38836 | 0.30943 | 0.30719 | 0.26170 | 0.33204 | 0.37773 |
| May        | 0.11537 | 0.04890 | 0.08108 | 0.09592 | 0.06494 | 0.13384 | 0.07519 | 0.09728 | 0.10171 | 0.11984 | 0.05484 |
| June       | 0.20413 | 0.15206 | 0.16239 | 0.17247 | 0.13882 | 0.17896 | 0.17145 | 0.18776 | 0.18379 | 0.16181 | 0.16143 |
| July       | 0.08973 | 0.05394 | 0.05412 | 0.08447 | 0.06678 | 0.08169 | 0.05905 | 0.06761 | 0.06035 | 0.05722 | 0.05908 |
| August     | 0.13371 | 0.10681 | 0.09023 | 0.09170 | 0.09617 | 0.14368 | 0.09155 | 0.11213 | 0.10396 | 0.07706 | 0.09505 |
| September  | 0.26667 | 0.19134 | 0.19774 | 0.21670 | 0.19489 | 0.25269 | 0.23985 | 0.32456 | 0.18485 | 0.23773 | 0.24702 |
| October    | 0.47190 | 0.46060 | 0.35393 | 0.34435 | 0.41749 | 0.42897 | 0.50301 | 0.42401 | 0.34979 | 0.47646 | 0.43850 |
| November   | 0.80476 | 0.79266 | 0.90207 | 0.78600 | 0.82689 | 0.82272 | 0.67609 | 0.75110 | 0.87531 | 0.71421 | 0.74789 |
| December   | 0.76139 | 0.61273 | 0.84598 | 0.67101 | 0.85273 | 0.83959 | 0.91781 | 0.86569 | 0.63078 | 0.70279 | 0.76307 |

Table S6 parameter estimates for  $\gamma$  as shown on Figure 4 for the observational data (SVK) and for the re-fitted data (WG1-10).

| $\gamma^{-1}$ | SVK     | WG1     | WG2     | WG3     | WG4     | WG5     | WG6     | WG7     | WG8     | WG9     | WG10    |
|---------------|---------|---------|---------|---------|---------|---------|---------|---------|---------|---------|---------|
| January       | 0.06288 | 0.07466 | 0.07720 | 0.05857 | 0.06784 | 0.05604 | 0.06736 | 0.05279 | 0.06407 | 0.07408 | 0.06979 |
| February      | 0.06183 | 0.05706 | 0.08869 | 0.06689 | 0.07468 | 0.08776 | 0.07879 | 0.07446 | 0.08324 | 0.07719 | 0.05333 |
| March         | 0.12451 | 0.11462 | 0.12760 | 0.10900 | 0.12029 | 0.07311 | 0.16920 | 0.13533 | 0.09024 | 0.13876 | 0.13224 |
| April         | 0.08978 | 0.10639 | 0.10136 | 0.11994 | 0.08886 | 0.17796 | 0.08229 | 0.08400 | 0.06807 | 0.12453 | 0.09292 |
| May           | 0.27018 | 0.25470 | 0.30882 | 0.23369 | 0.33572 | 0.23579 | 0.33246 | 0.22995 | 0.14504 | 0.22435 | 0.32227 |
| June          | 0.12984 | 0.11043 | 0.14663 | 0.14775 | 0.13524 | 0.16419 | 0.11681 | 0.14020 | 0.13583 | 0.12014 | 0.10647 |
| July          | 0.28615 | 0.29433 | 0.37770 | 0.21022 | 0.29054 | 0.20721 | 0.22406 | 0.31420 | 0.35881 | 0.31133 | 0.22580 |
| August        | 0.22627 | 0.28025 | 0.28883 | 0.25132 | 0.25619 | 0.12598 | 0.25862 | 0.24102 | 0.24386 | 0.31944 | 0.19260 |
| September     | 0.09398 | 0.09573 | 0.10091 | 0.11037 | 0.08581 | 0.09490 | 0.08266 | 0.10620 | 0.12116 | 0.14401 | 0.10760 |
| October       | 0.06812 | 0.09874 | 0.07041 | 0.08391 | 0.07506 | 0.06985 | 0.08176 | 0.08251 | 0.08131 | 0.07118 | 0.09198 |
| November      | 0.08508 | 0.08496 | 0.08487 | 0.10554 | 0.08678 | 0.10333 | 0.07967 | 0.07615 | 0.08179 | 0.08899 | 0.06586 |
| December      | 0.04553 | 0.04130 | 0.04620 | 0.05043 | 0.04816 | 0.05255 | 0.05093 | 0.06449 | 0.04619 | 0.05597 | 0.07057 |

### S1.2.2. Tables with change factors

Table S7 Change factors for the 24 hour mean for the six climate change scenarios as reported in Figure 10.

| 24 hour mean | HIRHAM SRES A1B | RACMO SRES A1B | HIRHAM RCP 4.5 | HIRHAM RCP 8.5 | WRF RCP 4.5 | WRF RCP 8.5 |
|--------------|-----------------|----------------|----------------|----------------|-------------|-------------|
| January      | 1.23553         | 1.30388        | 1.02567        | 1.06084        | 1.12765     | 1.23538     |
| February     | 1.11245         | 1.10416        | 0.97759        | 1.06651        | 1.10797     | 1.14306     |
| March        | 1.25228         | 1.18568        | 1.11590        | 1.02920        | 1.08328     | 1.09460     |
| April        | 1.26755         | 1.33504        | 0.85133        | 1.05316        | 1.06490     | 1.15468     |
| May          | 1.30449         | 1.25087        | 1.04735        | 1.09183        | 1.06892     | 1.07679     |
| June         | 1.06680         | 0.96221        | 1.14612        | 1.32866        | 0.80427     | 1.02819     |
| July         | 1.27999         | 1.00026        | 1.12312        | 1.15539        | 0.98412     | 1.05558     |
| August       | 1.15927         | 0.87629        | 0.95690        | 0.95979        | 1.04933     | 0.86372     |
| September    | 1.07528         | 1.09315        | 1.06110        | 0.97085        | 1.02966     | 1.11342     |
| October      | 1.13907         | 1.12644        | 1.05515        | 0.86584        | 1.40159     | 1.48525     |
| November     | 1.33973         | 1.30811        | 0.98924        | 1.01706        | 1.03710     | 1.27082     |
| December     | 1.20484         | 1.24938        | 1.04879        | 1.13112        | 1.09381     | 1.26071     |

Table S8 Change factors for the 24 hour variance for the six climate change scenarios as reported in Figure 10.

| 24 hour variance | HIRHAM SRES A1B | RACMO SRES A1B | HIRHAM RCP 4.5 | HIRHAM RCP 8.5 | WRF RCP 4.5 | WRF RCP 8.5 |
|------------------|-----------------|----------------|----------------|----------------|-------------|-------------|
| January          | 1.50144         | 1.52475        | 0.98131        | 1.13559        | 1.27757     | 1.56943     |
| February         | 1.30543         | 1.31600        | 1.09434        | 1.16314        | 1.21944     | 1.56812     |
| March            | 1.47334         | 1.47019        | 1.41286        | 1.22827        | 1.06285     | 1.30565     |
| April            | 1.40934         | 1.78456        | 0.88681        | 1.45401        | 1.09275     | 1.40061     |
| May              | 1.37147         | 1.42441        | 1.10468        | 1.64129        | 1.38100     | 1.47399     |
| June             | 1.36021         | 1.51175        | 1.56499        | 2.20074        | 0.94288     | 1.41727     |
| July             | 1.63430         | 1.31130        | 2.08154        | 2.86417        | 1.31464     | 1.91927     |
| August           | 1.58494         | 1.34014        | 1.30655        | 1.51431        | 1.65118     | 1.37813     |
| September        | 1.25310         | 1.26592        | 1.20112        | 1.62834        | 1.20286     | 1.40696     |
| October          | 1.48234         | 1.43906        | 1.45359        | 1.43251        | 1.46242     | 1.89362     |
| November         | 1.50361         | 1.43881        | 0.97390        | 1.10512        | 1.07280     | 1.42910     |
| December         | 1.35331         | 1.73331        | 1.16080        | 1.29154        | 1.11931     | 1.51390     |

Table S9 Change factors for the 24 hour skewness for the six climate change scenarios as reported in Figure 10.

| 24 hour skewness | HIRHAM SRES A1B | RACMO SRES A1B | HIRHAM RCP 4.5 | HIRHAM RCP 8.5 | WRF RCP 4.5 | WRF RCP 8.5 |
|------------------|-----------------|----------------|----------------|----------------|-------------|-------------|
| January          | 0.99142         | 0.84140        | 0.93685        | 1.07968        | 1.09407     | 1.09003     |
| February         | 0.91310         | 1.03779        | 1.09084        | 1.00477        | 0.84723     | 1.11371     |
| March            | 0.91927         | 1.05708        | 1.19057        | 1.03103        | 0.91741     | 1.10513     |
| April            | 0.94424         | 0.99764        | 1.16754        | 1.19511        | 1.04205     | 1.09465     |
| May              | 0.95870         | 0.85805        | 0.98985        | 1.42405        | 1.23482     | 1.31259     |
| June             | 1.20069         | 1.50512        | 1.29540        | 1.41142        | 1.24548     | 1.26800     |
| July             | 0.99944         | 1.33472        | 1.41164        | 1.61773        | 1.05677     | 1.39496     |
| August           | 1.14266         | 1.81091        | 1.35492        | 1.52285        | 1.44715     | 1.42466     |
| September        | 1.15609         | 1.00201        | 1.08477        | 1.44635        | 1.09522     | 1.13455     |
| October          | 1.28567         | 1.08069        | 1.38150        | 1.53367        | 0.83646     | 0.95204     |
| November         | 0.79038         | 0.86134        | 0.86639        | 0.90689        | 0.83202     | 0.91098     |
| December         | 0.92404         | 1.09938        | 0.99146        | 0.80017        | 1.00433     | 0.99929     |

Table S10 Change factors for the 1 hour variance for the six climate change scenarios as reported in Figure 10.

| 1 hour variance | HIRHAM SRES A1B | RACMO SRES A1B | HIRHAM RCP 4.5 | HIRHAM RCP 8.5 | WRF RCP 4.5 | WRF RCP 8.5 |
|-----------------|-----------------|----------------|----------------|----------------|-------------|-------------|
| January         | 1.45481         | 1.62029        | 0.98102        | 1.19482        | 1.20730     | 1.49446     |
| February        | 1.20815         | 1.18774        | 1.05779        | 1.22923        | 1.20132     | 1.38732     |
| March           | 1.41098         | 1.43374        | 1.32300        | 1.29879        | 1.20352     | 1.35586     |
| April           | 1.37850         | 1.56979        | 0.84667        | 1.39576        | 1.14422     | 1.56379     |
| May             | 1.46607         | 1.54308        | 1.23446        | 1.82475        | 1.89132     | 2.03428     |
| June            | 1.32314         | 1.39871        | 1.50368        | 3.06052        | 1.09647     | 1.92270     |
| July            | 1.71752         | 1.50786        | 2.22923        | 3.60512        | 1.43831     | 1.96226     |
| August          | 1.59110         | 1.28307        | 1.43392        | 2.16220        | 1.53735     | 1.59682     |
| September       | 1.32132         | 1.21700        | 1.33425        | 2.14812        | 1.41269     | 1.86565     |
| October         | 1.42613         | 1.41610        | 1.31692        | 1.46708        | 1.52533     | 2.13487     |
| November        | 1.66899         | 1.53753        | 1.10637        | 1.21986        | 1.11627     | 1.62402     |
| December        | 1.28540         | 1.56312        | 1.12538        | 1.35307        | 1.17963     | 1.50691     |



Table S11 Change factors for the 1 hour skewness for the six climate change scenarios as reported in Figure 10.

| 1 hour skewness | HIRHAM SRES A1B | RACMO SRES A1B | HIRHAM RCP 4.5 | HIRHAM RCP 8.5 | WRF RCP 4.5 | WRF RCP 8.5 |
|-----------------|-----------------|----------------|----------------|----------------|-------------|-------------|
| January         | 0.94751         | 0.91704        | 0.97498        | 1.05759        | 1.01138     | 1.03403     |
| February        | 0.90788         | 0.90832        | 1.03527        | 1.09020        | 0.96536     | 1.02183     |
| March           | 0.87467         | 0.96080        | 1.04267        | 1.24555        | 1.06845     | 1.15137     |
| April           | 0.94980         | 0.95594        | 1.17408        | 1.57158        | 1.14544     | 1.23819     |
| May             | 1.12316         | 1.01743        | 1.20464        | 1.72648        | 1.75039     | 1.87867     |
| June            | 1.24977         | 1.37040        | 1.25046        | 1.67922        | 1.42530     | 1.55005     |
| July            | 1.25484         | 1.57894        | 1.47388        | 1.74784        | 1.17367     | 1.27505     |
| August          | 1.36711         | 1.75725        | 1.29488        | 2.00374        | 1.26096     | 1.57177     |
| September       | 1.29795         | 1.03654        | 1.22417        | 1.85997        | 1.37124     | 1.44856     |
| October         | 1.04387         | 1.08944        | 1.23211        | 1.89645        | 0.97153     | 1.23196     |
| November        | 1.01756         | 0.93508        | 1.08237        | 1.16484        | 1.12331     | 1.18021     |
| December        | 0.92301         | 0.96640        | 1.00494        | 0.99472        | 0.97327     | 0.98467     |

Table S12 Change factors for the lag-1 auto-correlation for the six climate change scenarios as reported in Figure 10.

| lag-1 auto-correlation | HIRHAM SRES A1B | RACMO SRES A1B | HIRHAM RCP 4.5 | HIRHAM RCP 8.5 | WRF RCP 4.5 | WRF RCP 8.5 |
|------------------------|-----------------|----------------|----------------|----------------|-------------|-------------|
| January                | 1.02872         | 0.91301        | 0.91352        | 0.93224        | 0.93332     | 0.91662     |
| February               | 1.09834         | 1.09376        | 0.96309        | 0.89008        | 1.06247     | 1.07327     |
| March                  | 1.18586         | 1.07865        | 0.94293        | 0.89870        | 0.90251     | 0.91005     |
| April                  | 1.00374         | 1.31779        | 1.05914        | 1.01495        | 0.83425     | 0.76030     |
| May                    | 0.94624         | 0.89057        | 0.92295        | 0.85670        | 0.69671     | 0.70949     |
| June                   | 1.04799         | 1.14945        | 1.03826        | 0.79513        | 0.91104     | 0.79572     |
| July                   | 1.09740         | 0.97665        | 0.94476        | 0.81728        | 0.94403     | 0.99747     |
| August                 | 0.98586         | 1.00757        | 0.98239        | 0.76123        | 1.00779     | 0.91500     |
| September              | 0.85808         | 0.93328        | 0.98090        | 0.76155        | 0.79861     | 0.77871     |
| October                | 1.01448         | 0.91033        | 0.99147        | 0.83331        | 0.82275     | 0.74061     |
| November               | 0.96197         | 0.99896        | 0.95087        | 0.94921        | 0.84858     | 0.79617     |
| December               | 1.11004         | 1.11706        | 1.03458        | 0.95916        | 0.92669     | 0.91142     |

Table S13 Change factors for the probability of dry days for the six climate change scenarios as reported in Figure 10.

| Probability of dry days | HIRHAM SRES A1B | RACMO SRES A1B | HIRHAM RCP 4.5 | HIRHAM RCP 8.5 | WRF RCP 4.5 | WRF RCP 8.5 |
|-------------------------|-----------------|----------------|----------------|----------------|-------------|-------------|
| January                 | 0.81959         | 0.82460        | 0.93661        | 0.96179        | 0.90669     | 0.89907     |
| February                | 1.01172         | 1.00942        | 1.15178        | 1.00596        | 0.99078     | 1.05763     |
| March                   | 0.84054         | 0.97246        | 0.98344        | 1.12789        | 0.89592     | 1.01757     |
| April                   | 0.76380         | 0.91973        | 1.21165        | 1.20060        | 0.96006     | 0.94551     |
| May                     | 0.66365         | 0.94083        | 0.96052        | 0.99802        | 1.04899     | 1.04324     |
| June                    | 1.06950         | 1.26073        | 0.93925        | 0.82516        | 1.41065     | 1.10425     |
| July                    | 0.79649         | 1.23068        | 1.18080        | 1.30380        | 1.32271     | 1.29028     |
| August                  | 0.99644         | 1.31603        | 1.13442        | 1.20088        | 1.22037     | 1.75701     |
| September               | 0.99091         | 1.08769        | 0.95674        | 1.32391        | 1.07702     | 1.08782     |
| October                 | 0.94102         | 1.06649        | 1.08776        | 1.63545        | 0.65500     | 0.69348     |
| November                | 0.72594         | 0.76928        | 1.08552        | 1.10950        | 1.03194     | 0.75676     |
| December                | 0.77919         | 0.90595        | 1.04593        | 1.02771        | 0.92582     | 0.86615     |

Table S14 Change factors for the probability of dry hours for the six climate change scenarios as reported in Figure 10.

| Probability of dry hours | HIRHAM SRES A1B | RACMO SRES A1B | HIRHAM RCP 4.5 | HIRHAM RCP 8.5 | WRF RCP 4.5 | WRF RCP 8.5 |
|--------------------------|-----------------|----------------|----------------|----------------|-------------|-------------|
| January                  | 0.83184         | 0.83829        | 0.92326        | 0.98566        | 0.90984     | 0.87146     |
| February                 | 0.95000         | 0.98539        | 1.09732        | 0.99672        | 0.94948     | 0.98494     |
| March                    | 0.83256         | 0.95434        | 0.97605        | 1.09202        | 0.97607     | 1.03381     |
| April                    | 0.79246         | 0.83815        | 1.12922        | 1.06891        | 0.96089     | 0.99221     |
| May                      | 0.73436         | 0.89447        | 0.98120        | 1.00293        | 1.10196     | 1.10855     |
| June                     | 1.01341         | 1.19447        | 0.93487        | 0.91750        | 1.31153     | 1.13891     |
| July                     | 0.81582         | 1.21161        | 1.12743        | 1.26076        | 1.28493     | 1.28294     |
| August                   | 0.94646         | 1.25228        | 1.17933        | 1.20261        | 1.16141     | 1.61613     |
| September                | 0.97736         | 1.01681        | 0.99810        | 1.33951        | 1.09782     | 1.10872     |
| October                  | 1.00658         | 1.04474        | 1.05084        | 1.44645        | 0.67796     | 0.72866     |
| November                 | 0.79100         | 0.79974        | 1.07563        | 1.07174        | 0.99650     | 0.82702     |
| December                 | 0.82661         | 0.87772        | 0.99069        | 0.98478        | 0.96012     | 0.86620     |

### S1.2.3. Tables with estimated parameters for future conditions

Table S15 parameter estimates for  $\lambda$  for the six runs representing climate change.

| $\lambda^{-1}$ | HIRHAM SRES A1B | RACMO SRES A1B | HIRHAM RCP 4.5 | HIRHAM RCP 8.5 | WRF RCP 4.5 | WRF RCP 8.5 |
|----------------|-----------------|----------------|----------------|----------------|-------------|-------------|
| January        | 0.01497         | 0.01482        | 0.00979        | 0.00458        | 0.00451     | 0.00423     |
| February       | 0.00841         | 0.00328        | 0.00213        | 0.00268        | 0.00856     | 0.00254     |
| March          | 0.00897         | 0.00895        | 0.00515        | 0.00561        | 0.00840     | 0.00708     |
| April          | 0.00598         | 0.00444        | 0.00364        | 0.00190        | 0.00402     | 0.00336     |
| May            | 0.00399         | 0.00494        | 0.00374        | 0.00203        | 0.00353     | 0.00314     |
| June           | 0.00295         | 0.00240        | 0.00300        | 0.00376        | 0.00298     | 0.00358     |
| July           | 0.00182         | 0.00119        | 0.00126        | 0.00133        | 0.00179     | 0.00178     |
| August         | 0.00260         | 0.00137        | 0.00352        | 0.00227        | 0.00195     | 0.00202     |
| September      | 0.00144         | 0.00134        | 0.00323        | 0.00176        | 0.00256     | 0.00302     |
| October        | 0.00436         | 0.00172        | 0.00131        | 0.00191        | 0.00328     | 0.00507     |
| November       | 0.01064         | 0.01825        | 0.01038        | 0.00965        | 0.01007     | 0.01564     |
| December       | 0.03032         | 0.04125        | 0.01813        | 0.01454        | 0.01271     | 0.01326     |

Table S16 parameter estimates for  $\beta$  for the six runs representing climate change.

| $\beta^{-1}$ | HIRHAM SRES A1B | RACMO SRES A1B | HIRHAM RCP 4.5 | HIRHAM RCP 8.5 | WRF RCP 4.5 | WRF RCP 8.5 |
|--------------|-----------------|----------------|----------------|----------------|-------------|-------------|
| January      | 0.10228         | 0.12588        | 0.06688        | 0.02000        | 0.02000     | 0.02000     |
| February     | 0.11752         | 0.02000        | 0.02000        | 0.02000        | 0.21277     | 0.02000     |
| March        | 0.37778         | 0.23049        | 0.05813        | 0.39455        | 0.37975     | 0.22917     |
| April        | 0.13606         | 0.45043        | 0.19231        | 0.40096        | 0.09786     | 0.07063     |
| May          | 0.42351         | 0.41444        | 0.46009        | 0.39174        | 0.39745     | 0.42700     |
| June         | 0.22465         | 0.12926        | 0.11463        | 0.28447        | 0.30036     | 0.33708     |
| July         | 0.38427         | 0.40893        | 0.31017        | 0.32497        | 0.39976     | 0.15983     |
| August       | 0.33388         | 0.19607        | 0.19969        | 0.47681        | 0.06328     | 0.39460     |
| September    | 0.03928         | 0.02498        | 0.13210        | 0.11980        | 0.11750     | 0.12441     |
| October      | 0.02000         | 0.02000        | 0.02000        | 0.11513        | 0.02000     | 0.05434     |
| November     | 0.03443         | 0.34711        | 0.46317        | 0.49466        | 0.40919     | 0.33801     |
| December     | 0.49999         | 0.42535        | 0.12649        | 0.20448        | 0.02000     | 0.02000     |

Table S17 parameter estimates for  $\rho$  for the six runs representing climate change.

| $\rho^{-1}$ | HIRHAM SRES A1B | RACMO SRES A1B | HIRHAM RCP 4.5 | HIRHAM RCP 8.5 | WRF RCP 4.5 | WRF RCP 8.5 |
|-------------|-----------------|----------------|----------------|----------------|-------------|-------------|
| January     | 0.00277         | 0.00509        | 0.00532        | 0.00660        | 0.00680     | 0.00747     |
| February    | 0.00835         | 0.00998        | 0.01756        | 0.01418        | 0.01779     | 0.01172     |
| March       | 0.08949         | 0.01638        | 0.01094        | 0.19014        | 0.07372     | 0.02077     |
| April       | 0.01098         | 0.09798        | 0.01802        | 0.70012        | 0.01247     | 0.01148     |
| May         | 0.15163         | 0.13340        | 0.14095        | 0.07322        | 0.01933     | 0.01984     |
| June        | 0.04753         | 0.01854        | 0.01919        | 0.01307        | 0.04431     | 0.02540     |
| July        | 0.31685         | 0.26921        | 0.13829        | 0.05098        | 0.42805     | 0.03377     |
| August      | 0.17808         | 0.06106        | 0.02610        | 0.05638        | 0.03260     | 0.16514     |
| September   | 0.02895         | 0.04284        | 0.01710        | 0.01553        | 0.02349     | 0.01432     |
| October     | 0.00410         | 0.02534        | 0.01801        | 0.01769        | 0.01768     | 0.00908     |
| November    | 0.00000         | 0.01191        | 0.16003        | 0.14928        | 0.19668     | 0.01027     |
| December    | 0.00106         | 0.00040        | 0.00123        | 0.00431        | 0.00134     | 0.00129     |

Table S18 parameter estimates for  $\eta$  for the six runs representing climate change.

| $\eta^{-1}$ | HIRHAM SRES A1B | RACMO SRES A1B | HIRHAM RCP 4.5 | HIRHAM RCP 8.5 | WRF RCP 4.5 | WRF RCP 8.5 |
|-------------|-----------------|----------------|----------------|----------------|-------------|-------------|
| January     | 0.81707         | 1.19646        | 1.10633        | 0.94527        | 0.90228     | 0.95818     |
| February    | 0.84178         | 0.67766        | 0.96566        | 1.15210        | 1.14480     | 0.74061     |
| March       | 1.42037         | 1.32760        | 1.35332        | 5.34072        | 3.29063     | 2.09810     |
| April       | 1.22086         | 0.79275        | 1.22642        | 4.55953        | 1.70957     | 1.85088     |
| May         | 12.00000        | 12.00000       | 12.00000       | 11.99998       | 11.99999    | 12.00000    |
| June        | 2.55280         | 1.56822        | 1.86203        | 3.04200        | 3.41964     | 3.79788     |
| July        | 12.00000        | 11.99999       | 4.57787        | 4.10830        | 11.99974    | 2.33939     |
| August      | 11.99988        | 3.30778        | 2.61570        | 12.00000       | 2.19402     | 7.96626     |
| September   | 1.72250         | 1.46658        | 1.49843        | 2.22514        | 2.27677     | 2.12326     |
| October     | 0.67764         | 1.26209        | 0.92040        | 2.00840        | 1.47884     | 1.84352     |
| November    | 0.80103         | 1.29071        | 2.61043        | 2.51444        | 5.58099     | 2.15387     |
| December    | 0.45321         | 0.38695        | 0.55351        | 0.87549        | 0.62230     | 0.65224     |

Table S19 parameter estimates for  $\xi$  for the six runs representing climate change.

| $\xi^{-1}$ | HIRHAM SRES A1B | RACMO SRES A1B | HIRHAM RCP 4.5 | HIRHAM RCP 8.5 | WRF RCP 4.5 | WRF RCP 8.5 |
|------------|-----------------|----------------|----------------|----------------|-------------|-------------|
| January    | 0.70567         | 0.72094        | 0.65789        | 0.54865        | 0.58377     | 0.55984     |
| February   | 0.68097         | 0.60651        | 0.48035        | 0.43672        | 0.68561     | 0.51355     |
| March      | 0.76417         | 0.49717        | 0.37466        | 0.23446        | 0.36911     | 0.33417     |
| April      | 0.35207         | 0.61847        | 0.26704        | 0.17908        | 0.23422     | 0.18889     |
| May        | 0.04979         | 0.05064        | 0.04069        | 0.02243        | 0.01952     | 0.01778     |
| June       | 0.12375         | 0.10651        | 0.12504        | 0.06254        | 0.07768     | 0.06201     |
| July       | 0.02028         | 0.01303        | 0.02599        | 0.01774        | 0.01825     | 0.03814     |
| August     | 0.03032         | 0.04649        | 0.06944        | 0.01374        | 0.07767     | 0.02781     |
| September  | 0.14781         | 0.20635        | 0.17000        | 0.06817        | 0.12345     | 0.10942     |
| October    | 0.35665         | 0.35725        | 0.31269        | 0.14741        | 0.44124     | 0.29137     |
| November   | 3.99984         | 0.92296        | 0.78794        | 0.71965        | 0.46955     | 0.52784     |
| December   | 1.08418         | 0.87816        | 0.81522        | 0.88719        | 0.70956     | 0.68841     |

Table S20 parameter estimates for  $\gamma$  for the six runs representing climate change.

| $\gamma^{-1}$ | HIRHAM SRES A1B | RACMO SRES A1B | HIRHAM RCP 4.5 | HIRHAM RCP 8.5 | WRF RCP 4.5 | WRF RCP 8.5 |
|---------------|-----------------|----------------|----------------|----------------|-------------|-------------|
| January       | 0.05908         | 0.06440        | 0.05964        | 0.05413        | 0.05448     | 0.05475     |
| February      | 0.07726         | 0.06235        | 0.06480        | 0.06208        | 0.09943     | 0.06303     |
| March         | 0.19130         | 0.10378        | 0.07343        | 0.21550        | 0.16264     | 0.10420     |
| April         | 0.08796         | 0.22357        | 0.10532        | 0.33779        | 0.08206     | 0.07634     |
| May           | 0.23924         | 0.22801        | 0.23914        | 0.18479        | 0.12717     | 0.12996     |
| June          | 0.16203         | 0.12317        | 0.11951        | 0.12489        | 0.16578     | 0.14680     |
| July          | 0.37208         | 0.35926        | 0.28328        | 0.21801        | 0.41511     | 0.17774     |
| August        | 0.27631         | 0.19074        | 0.16022        | 0.21653        | 0.13892     | 0.28649     |
| September     | 0.09778         | 0.09841        | 0.11049        | 0.10292        | 0.11054     | 0.10249     |
| October       | 0.06180         | 0.07115        | 0.06983        | 0.08592        | 0.06705     | 0.06858     |
| November      | 0.04931         | 0.09447        | 0.20614        | 0.20574        | 0.20020     | 0.08551     |
| December      | 0.05701         | 0.04906        | 0.04997        | 0.06315        | 0.04350     | 0.04330     |

## References

- Burton. A., Kilsby. C. G., Fowler. H. J., Cowpertwait. P. S. P. and O'Connell. P. E.: RainSim: a spatial temporal stochastic rainfall modelling system. *Environmental Modelling and Software*. 23(12). 1356-1369. doi: 10.1016/j.envsoft.2008.04.003. 2008.
- Burton. A., Fowler. H. J., Kilsby. C. G., and O'Connell. P. E.: A stochastic model for the spatial-temporal simulation of nonhomogeneous rainfall occurrence and amounts. *Water Resources Research*. 46(11). doi:10.1029/2009WR008884. 2010a.
- Burton. A., Fowler. H.J., Blenkinsop. S., and Kilsby. C.G.: Downscaling transient climate change using a Neyman-Scott Rectangular Pulses stochastic rainfall model . *Journal of Hydrology*. 381 (1-2) 18-32. DOI: 10.1016/j.jhydrol.2009.10.031. 2010b.
- Cowpertwait. P. S. P.: A Generalized Spatial-Temporal Model of Rainfall Based on a Clustered Point Process. *Proceedings of the Royal Society A: Mathematical, Physical and Engineering Sciences*. 450(1938). 163–175. doi:10.1098/rspa.1995.0077. 1995.
- Cowpertwait. P. S. P.: A spatial-temporal point process model of rainfall for the Thames catchment. UK. *Journal of Hydrology*. 330(3-4). 586–595. doi:10.1016/j.jhydrol.2006.04.043. 2006.
