# Supplementary material for: Downscaling future precipitation extremes to urban hydrology scales using a spatio-temporal Neyman–Scott weather generator
Source: Copernicus journal article supplement (doi:10.5194/hess-20-1387-2016), 2016-04-08
Supplement: Supplementary file 2 [file hess-20-1387-2016-supplement.zip]

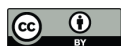

## *Supplement of*

# **Downscaling future precipitation extremes to urban hydrology scales using a spatio-temporal Neyman–Scott weather generator**

**H. J. D. Sørup et al.**

*Correspondence to:* Hjalte Jomo Danielsen Sørup (hjds@env.dtu.dk)

- [hess-20-1387-2016-supplement-title-page.pdf](#)
- [VideoSupplementaryMaterialForHESSPaper.avi](#)
- [supplement final.pdf](#)

The copyright of individual parts of the supplement might differ from the CC-BY 3.0 licence.
